# Supplementary material for: Preventive effect of Tyr-Pro, a blood-brain barrier transportable dipeptide, on memory impairment in SAMP8 mice
Source: PubMed Central journal article supplement — NPJ Sci Food. 2024 Dec 29;8:114. doi: 10.1038/s41538-024-00360-0 (PMC11683146; doi:10.1038/s41538-024-00360-0), 2024-12-29
Supplement: 41538_2024_360_MOESM1_ESM.pdf [file 41538_2024_360_MOESM1_ESM.pdf]

1 **Supplementary Information**

2 **Preventive effect of Tyr-Pro, a blood-brain barrier transportable**  
3 **dipeptide, on memory impairment in SAMP8 mice**

4  
5 Xixi Li<sup>1,#</sup>, Yuka Ichiba<sup>1,#</sup>, Takuya Watanabe<sup>2,#</sup>, Atsuko Yoshino<sup>1</sup>, Lihong Cheng<sup>1</sup>, Yuki  
6 Nagasato<sup>1</sup>, Fuyuko Takata<sup>3</sup>, Shinya Dohgu<sup>3</sup>, Katsunori Iwasaki<sup>2</sup> Mitsuru Tanaka<sup>1\*</sup>, Toshiro  
7 Matsui<sup>1\*</sup>

8 <sup>1</sup>Department of Bioscience and Biotechnology, Faculty of Agriculture, Graduate School of  
9 Kyushu University, Japan

10 <sup>2</sup>Department of Neuropharmacology, Faculty of Pharmaceutical Sciences, Fukuoka University,  
11 Fukuoka, Japan.

12 <sup>3</sup> Department of Pharmaceutical Care and Health Sciences, Faculty of Pharmaceutical Sciences,  
13 Fukuoka University, Fukuoka, Japan.

14 #Authors equally contribute to the study

15  
16 \*Co-corresponding authors:

17 **Mitsuru Tanaka, Ph.D.**, Department of Bioscience and Biotechnology, Faculty of  
18 Agriculture, Graduate School of Kyushu University, 744 Motooka, Nishi-ku, Fukuoka  
19 819-0395, Japan

20 **Email:** mitsurut@agr.kyushu-u.ac.jp

21 **Tel/Fax:** +81-92-802-4753

22 **Toshiro Matsui, Ph.D.**, Department of Bioscience and Biotechnology, Faculty of

23 Agriculture, Graduate School of Kyushu University, 744 Motooka, Nishi-ku, Fukuoka

24 819-0395, Japan

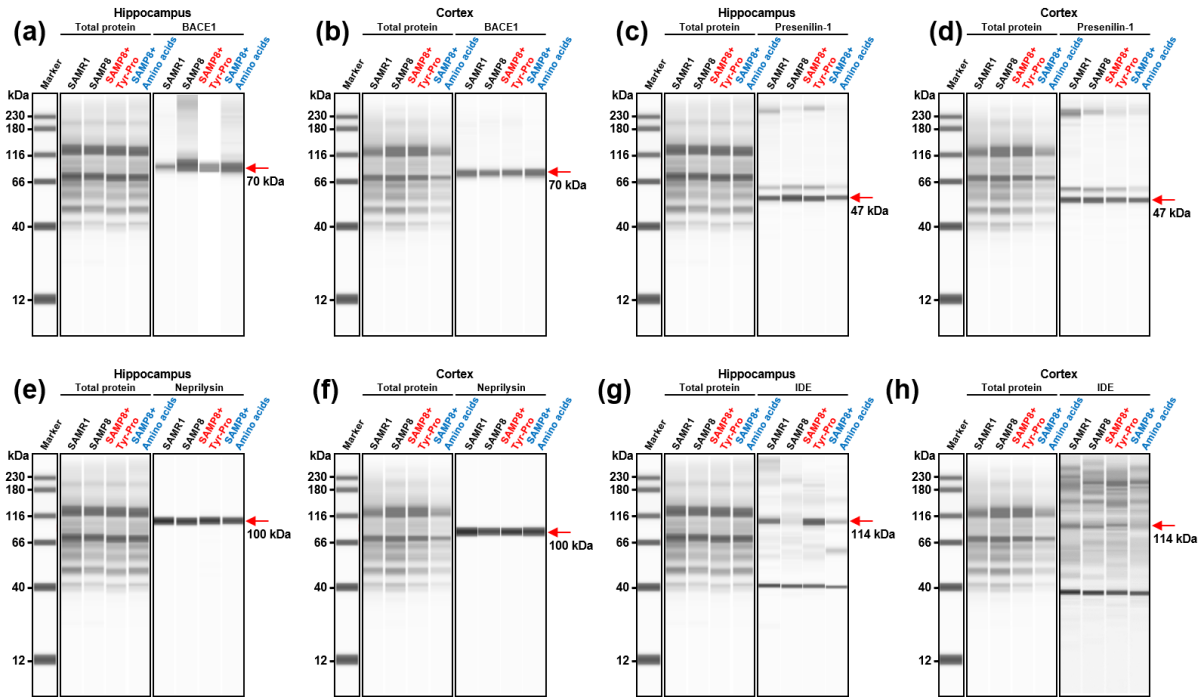

25

26 **Supplementary Figure 1.** Uncropped virtual blot-like images of BACE1 (a, b), presenilin-1

27 (c, d), neprilysin (e, f), and IDE (g, h) expression in the hippocampus and cortex of SAMP8

28 mice by a Wes analysis.
